# Supplementary material for: Effectiveness of a Quality Improvement Intervention on Reperfusion Treatment for Patients With Acute Ischemic Stroke: A Stepped-Wedge Cluster Randomized Clinical Trial
Source: PubMed Central journal article supplement (PMC10238948; doi:10.1001/jamanetworkopen.2023.16465), 2023-06-02
Supplement: jamanetwopen-e2316465-s003.pdf [file jamanetwopen-e2316465-s003.pdf]

\*First name, last name, and suffix (if applicable) are required and will appear in PubMed.

| <b>*Group Name(s): IMPROVE Stroke Care in China investigators</b> |                   |                              |                  |                                                      |                                          |                                                         |                                                                                            |
|-------------------------------------------------------------------|-------------------|------------------------------|------------------|------------------------------------------------------|------------------------------------------|---------------------------------------------------------|--------------------------------------------------------------------------------------------|
| <b>*First Name and Middle Initial(s)</b>                          | <b>*Last Name</b> | <b>*Suffix (eg, Jr, III)</b> | Academic Degrees | Institution                                          | Location (city, state/province, country) | Role or Contribution, eg, chair, principal investigator | Group (if more than 1 Group listed in the byline and/or Subgroup (eg, Steering Committee)) |
| Qingcheng                                                         | Yang              |                              | MD               | People's Hospital of Anyang city                     | Anyang, Henan, China                     | Site Investigator                                       |                                                                                            |
| Guangsheng                                                        | Chen              |                              | MD               | People's Hospital fo boluo County                    | Boluo County, Guangdong, China           | Site Investigator                                       |                                                                                            |
| Qianli                                                            | Ma                |                              | MD               | People's Hospital of haining city                    | Haining, Zhejiang, China                 | Site Investigator                                       |                                                                                            |
| Xiaobo                                                            | Li                |                              | MD               | Subei People's Hospital of Jiangsu province          | Yangzhou, Jiangsu, China                 | Site Investigator                                       |                                                                                            |
| Jun                                                               | Chen              |                              | MD               | The First Hospital of Lanzhou University             | Lanzhou, Gansu, China                    | Site Investigator                                       |                                                                                            |
| Xiuli                                                             | Zhao              |                              | MD               | Affiliated Hospital of Qinghai University            | Xining, Qinghai, China                   | Site Investigator                                       |                                                                                            |
| Hongping                                                          | Wang              |                              | MD               | The First People's Hospital of Qingzhen city         | Qingzhen, Guizhou, China                 | Site Investigator                                       |                                                                                            |
| Xiaoyuan                                                          | Niu               |                              | MD               | First Hospital of Shanxi Medical University          | Taiyuan, Shanxi, China                   | Site Investigator                                       |                                                                                            |
| Jianhua                                                           | Xu                |                              | MD               | Jiading District Central Hospital of Shanghai city   | Shanghai, China                          | Site Investigator                                       |                                                                                            |
| Lile                                                              | Zhao              |                              | MD               | Xiqing hospital of Tianjin city                      | Tianjin, China                           | Site Investigator                                       |                                                                                            |
| Zicheng                                                           | Wang              |                              | MD               | People's Hospital of Wuzhong city                    | Wuzhong, Ningxia, China                  | Site Investigator                                       |                                                                                            |
| Danqin                                                            | Huang             |                              | MD               | Hospital of Wuyishan City                            | Wuyishan, Fujian, China                  | Site Investigator                                       |                                                                                            |
| Xiaoping                                                          | Jin               |                              | MD               | Taizhou Hospital of Zhejiang Province                | Taizhou, Zhejiang, China                 | Site Investigator                                       |                                                                                            |
| Shengli                                                           | Chen              |                              | MD               | Three Gorges Center Hospital of Chongqing            | Chongqing, China                         | Site Investigator                                       |                                                                                            |
| Jianhua                                                           | Li                |                              | MD, PhD          | The First Hospital of Fangshan District              | Beijing, China                           | Site Investigator                                       |                                                                                            |
| Juming                                                            | Yu                |                              | MD               | Affiliated hospital of north sichuan medical college | Nanchong, Sichuan, China                 | Site Investigator                                       |                                                                                            |

## Supplemental Online Content: Nonauthor Collaborators

\*First name, last name, and suffix (if applicable) are required and will appear in PubMed.

| *First Name and Middle Initial(s) | *Last Name | *Suffix (eg, Jr, III) | Academic Degrees | Institution                                                         | Location (city, state/province, country) | Role or Contribution, eg, chair, principal investigator | Group (if more than 1 Group listed in the byline) and/or Subgroup (eg, Steering Committee) |
|-----------------------------------|------------|-----------------------|------------------|---------------------------------------------------------------------|------------------------------------------|---------------------------------------------------------|--------------------------------------------------------------------------------------------|
| Ping                              | Liu        |                       | MD               | Dali bai autonomous prefecture people's hospital                    | Dali, Yunnan, China                      | Site Investigator                                       |                                                                                            |
| Guozhong                          | Li         |                       | MD               | The First Clinical Hospital affiliated to Harbin Medical University | Harbin, Heilongjiang, China              | Site Investigator                                       |                                                                                            |
| Yanlei                            | Hao        |                       | MD               | Affiliated Hospital of Jining Medical University                    | Jining, Shandong, China                  | Site Investigator                                       |                                                                                            |
| Guancheng                         | Yang       |                       | MD               | People's Hospital of jishan County                                  | Jishan county, Shanxi, China             | Site Investigator                                       |                                                                                            |
| Xiaoxin                           | Huang      |                       | MD               | Jieyang city People's Hospital                                      | Jieyang, Guangdong, China                | Site Investigator                                       |                                                                                            |
| Chengfang                         | Zhou       |                       | MD               | The second hospital, university of south China                      | Changsha, Hunan, China                   | Site Investigator                                       |                                                                                            |
| Junsu                             | Yang       |                       | MD               | The First People's Hospital of Qujing city                          | Qujing, Yunnan, China                    | Site Investigator                                       |                                                                                            |
| Jun                               | Gu         |                       | MD               | Jiangsu rudong county People's Hospital                             | Rudong, Jiangsu, China                   | Site Investigator                                       |                                                                                            |
| Peng                              | Sun        |                       | MD               | Sanya people's hospital                                             | Sanya, Hainan, China                     | Site Investigator                                       |                                                                                            |
| Zaiyu                             | Guo        |                       | MD               | Tianjin Teda hospital                                               | Tianjin, China                           | Site Investigator                                       |                                                                                            |
| Guoping                           | Ma         |                       | MD               | First People's Hospital of Tianshui city                            | Tianshui, Gansu, China                   | Site Investigator                                       |                                                                                            |
| Guohua                            | Chen       |                       | MD               | Wuhan No. 1 Hospital                                                | Wuhan, Hubei, China                      | Site Investigator                                       |                                                                                            |
| Mingshan                          | Tang       |                       | MD               | Banan People's Hospital of Chongqing                                | Chongqing, China                         | Site Investigator                                       |                                                                                            |
| Ning                              | Wang       |                       | MD               | The first affiliated hospital of fujian medical university          | Fuzhou, Fujian, China                    | Site Investigator                                       |                                                                                            |
| Lixia                             | Chen       |                       | MD               | The 2nd Affiliated Hospital of Harbin Medical University            | Harbin, Heilongjiang, China              | Site Investigator                                       |                                                                                            |
| Juntao                            | Li         |                       | MD               | Handan Central Hospital                                             | Handan, Hebei, China                     | Site Investigator                                       |                                                                                            |
| Aiwu                              | Li         |                       | MD               | People's Hospital of zunhua                                         | Zunhua, Hebei, China                     | Site Investigator                                       |                                                                                            |
| Song                              | Li         |                       | MD               | Jilin Province People's Hospital                                    | Changchun, Jilin, China                  | Site Investigator                                       |                                                                                            |
| Minghua                           | Cao        |                       | MD               | The First People's Hospital of Jingdezhen city                      | Jingdezhen, Jiangxi, China               | Site Investigator                                       |                                                                                            |

## Supplemental Online Content: Nonauthor Collaborators

\*First name, last name, and suffix (if applicable) are required and will appear in PubMed.

| *First Name and Middle Initial(s) | *Last Name | *Suffix (eg, Jr, III) | Academic Degrees | Institution                                           | Location (city, state/province, country) | Role or Contribution, eg, chair, principal investigator | Group (if more than 1 Group listed in the byline) and/or Subgroup (eg, Steering Committee) |
|-----------------------------------|------------|-----------------------|------------------|-------------------------------------------------------|------------------------------------------|---------------------------------------------------------|--------------------------------------------------------------------------------------------|
| Jianqiang                         | Guo        |                       | MD               | The Fourth People's Hospital of Langfang city         | Langfang, Hebei, China                   | Site Investigator                                       |                                                                                            |
| Youquan                           | Ren        |                       | MD               | People's Hospital of Linqun County                    | Linqun County, Anhui, China              | Site Investigator                                       |                                                                                            |
| Tong                              | Li         |                       | MD               | The second nanning People's Hospita                   | Nanning, Guangxi, China                  | Site Investigator                                       |                                                                                            |
| Lihong                            | Zhang      |                       | MD               | Shenyang 739 Hospital                                 | Shenyang, Liaoning, China                | Site Investigator                                       |                                                                                            |
| Zhaoming                          | Xie        |                       | MD               | People's Hospital of Tengchong city                   | Tengchong, Yunnan, China                 | Site Investigator                                       |                                                                                            |
| Junlin                            | Dong       |                       | MD               | People's Hospital of Wusu city                        | Wusu, Xinjiang, China                    | Site Investigator                                       |                                                                                            |
| Xiangfeng                         | Kong       |                       | MD               | Xinjiang Medical University Fifth Affiliated Hospital | Urumqi, Xinjiang, China                  | Site Investigator                                       |                                                                                            |
| Hui                               | Liang      |                       | MD               | Yantai Mountain Hospital                              | Yantai, Shandong, China                  | Site Investigator                                       |                                                                                            |
| Yan                               | Zhang      |                       | MD               | People's Hospital of Qinan County                     | Qinan County, Shandong, China            | Site Investigator                                       |                                                                                            |
