# Supplementary material for: Effectiveness of a Quality Improvement Intervention on Reperfusion Treatment for Patients With Acute Ischemic Stroke: A Stepped-Wedge Cluster Randomized Clinical Trial
Source: PubMed Central journal article supplement (PMC10238948; doi:10.1001/jamanetworkopen.2023.16465), 2023-06-02
Supplement: jamanetwopen-e2316465-s004.pdf [file jamanetwopen-e2316465-s004.pdf]

## Data Sharing Statement

Wang. Effectiveness of a Quality Improvement Intervention on Reperfusion Treatment for Patients With Acute Ischemic Stroke. *JAMA Netw Open*. Published June 02, 2023.  
doi:10.1001/jamanetworkopen.2023.16465

### Data

**Data available:** Yes

**Data types:** Deidentified participant data, Data dictionary

**How to access data:** [yongjunwang@ncrcnd.org.cn](mailto:yongjunwang@ncrcnd.org.cn)

**When available:** With publication

### Supporting Documents

**Document types:** None

### Additional Information

**Who can access the data:** [yongjunwang@ncrcnd.org.cn](mailto:yongjunwang@ncrcnd.org.cn)

**Types of analyses:** For the purpose of repeating the current analysis

**Mechanisms of data availability:** with a signed data access agreement

**Any additional restrictions:** For the purpose of repeating the current analysis
